# Supplementary material for: Characteristics and sources of VOCs and the O 3 -NO x -VOCs relationships in the central plain city, China
Source: Copernicus journal article supplement (doi:10.5194/egusphere-2023-2835), 2024-01-08
Supplement: Supplementary file 1 [file egusphere-2023-2835-supplement.pdf]

## **Supplementary Materials:**

**Fig. S1.** The location of the observation site.

**Fig. S2** (a) The  $Q_{\text{true}}/Q_{\text{expected}}$  ratios in different solutions; (b) the  $Q_{\text{true}}/Q_{\text{expected}}$  ratio for different  $F_{\text{peak}}$  value solutions.

**Fig. S3.** Diurnal variations of  $\text{O}_3$ ,  $\text{NO}_x$ , and VOCs during the observation period.

**Fig. S4** CPF plots for the seven factors resolved by the multiple PMF methods.

**Fig. S5.** Response of the  $P(\text{O}_3)$  to different AVOCs and  $\text{NO}_x$  reduction percentages.

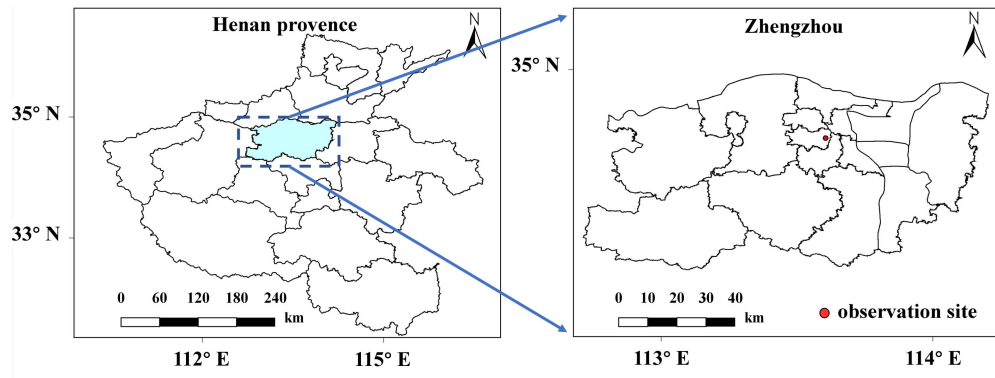

**Fig. S1.** The location of the observation site.

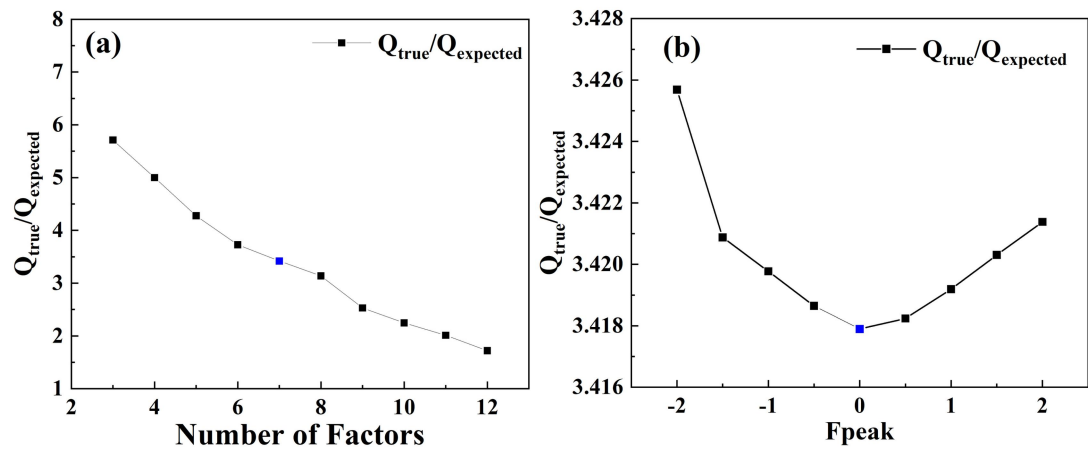

**Fig. S2.** (a) The  $Q_{\text{true}}/Q_{\text{expected}}$  ratios in different solutions; (b) the  $Q_{\text{true}}/Q_{\text{expected}}$  ratio for different  $F_{\text{peak}}$  value solutions.

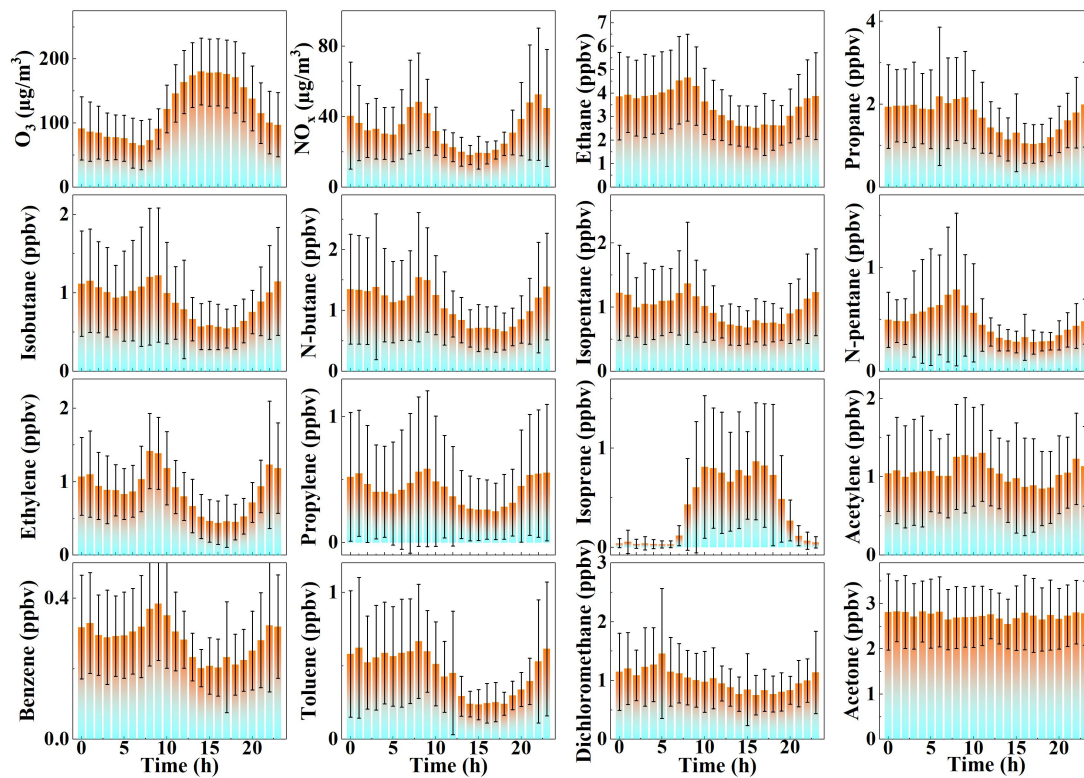

**Fig. S3.** Diurnal variations of  $O_3$ ,  $NO_x$ , and VOCs during the observation period.

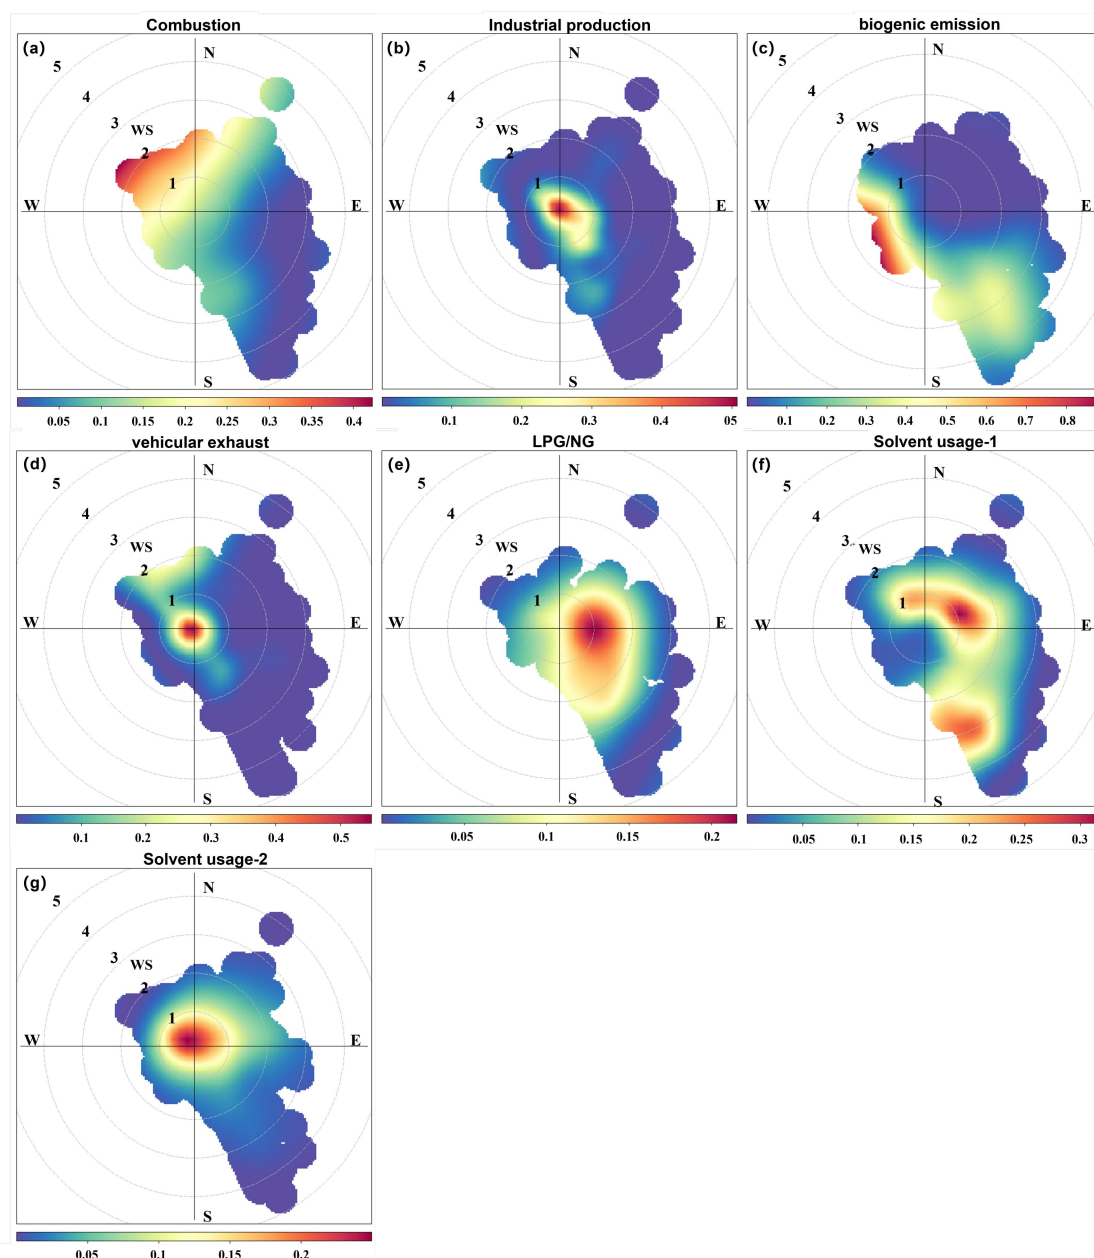

**Fig. S4.** CPF plots for the seven factors resolved by the multiple PMF methods.

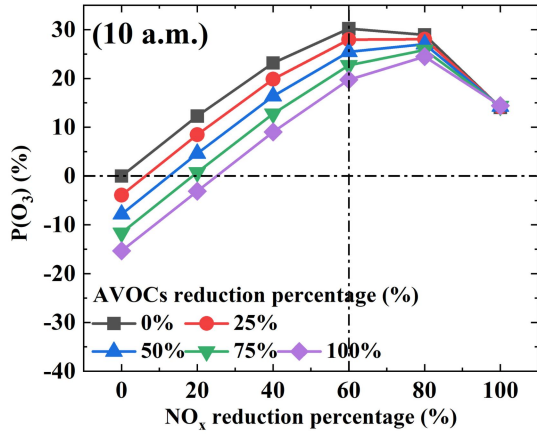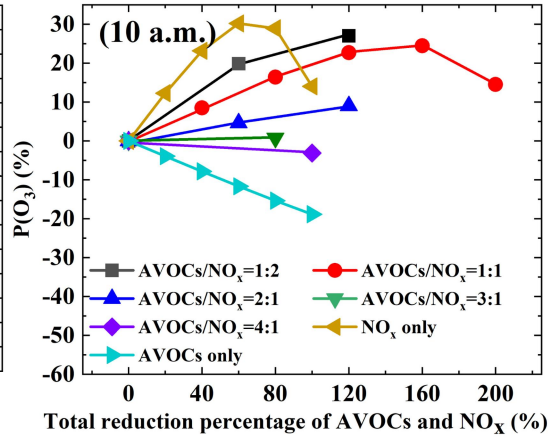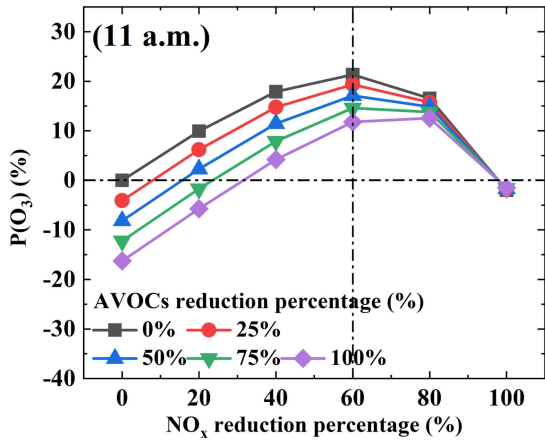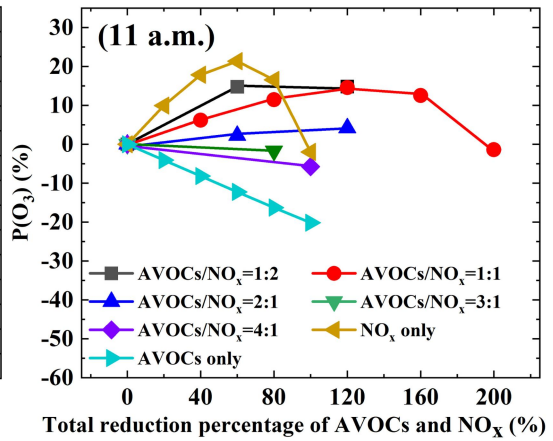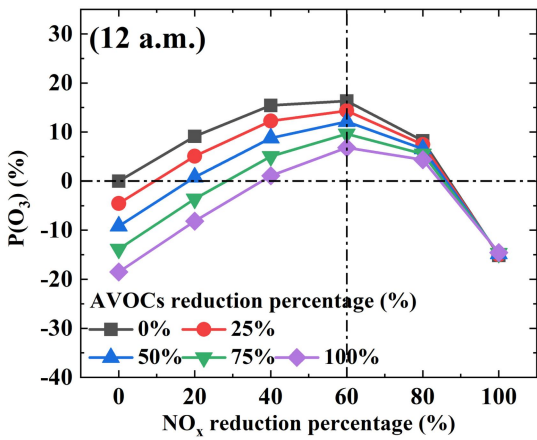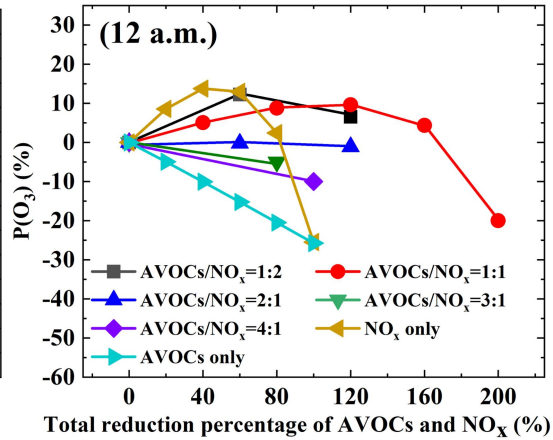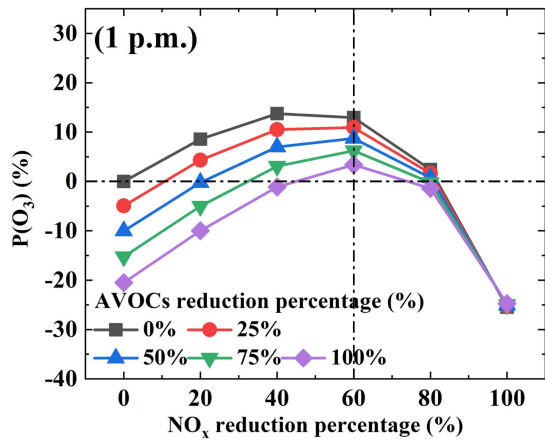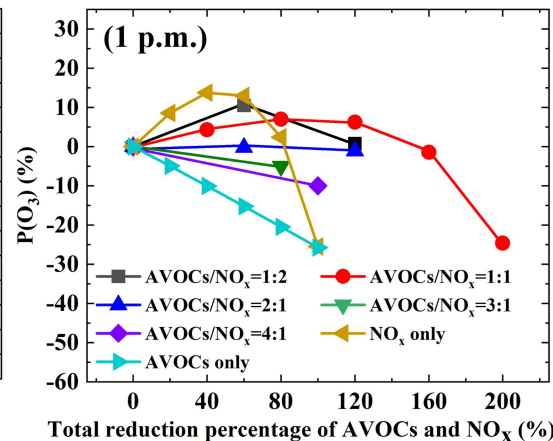

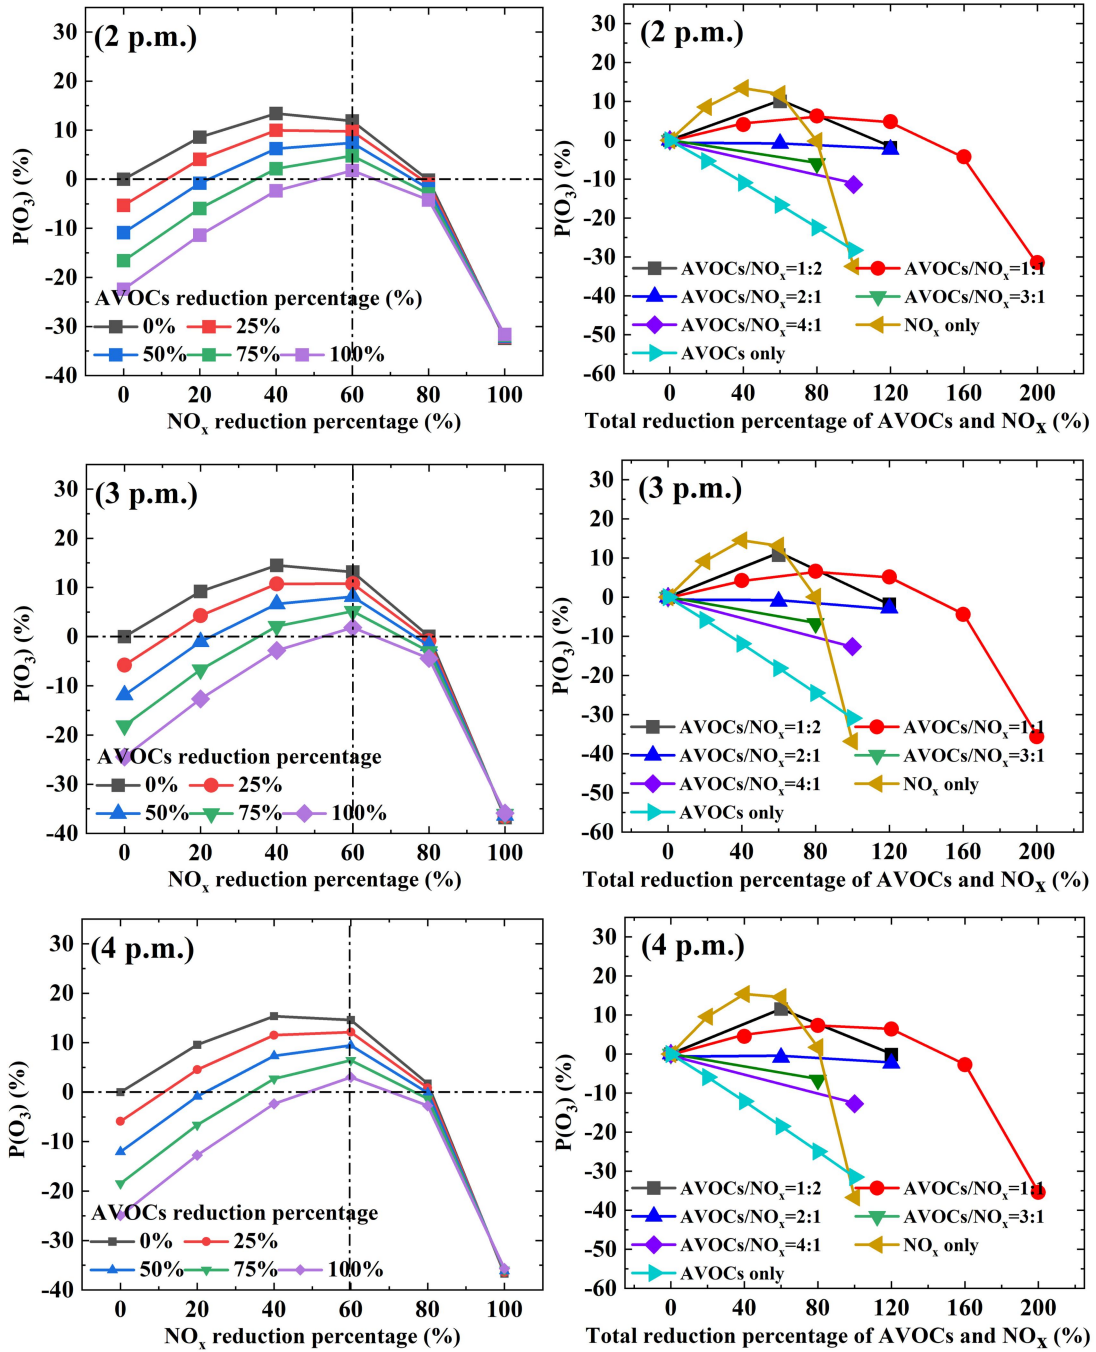

**Fig. S5.** Response of the  $P(O_3)$  to different AVOCs and  $NO_x$  reduction percentages.
